# Supplementary material for: Assessing toxicant emissions from e-liquids with DIY additives used in response to a potential flavour ban in e-cigarettes
Source: PubMed Central journal article supplement — Tob Control. 2022 Oct 28;31(Suppl 3):s245–8. doi: 10.1136/tc-2022-057505 (PMC9664124; doi:10.1136/tc-2022-057505), 2022-10-28
Supplement: tc-2022-057505supp001.pdf [file tc-2022-057505supp001.pdf]

## Supplemental Material

# Assessing Toxicant Emissions from E-liquids with DIY Additives Used in Response to a Potential Flavor Ban in E-cigarette Liquids

*Ahmad El-Hellani, PhD<sup>†,‡,§,j</sup>, Eric K. Soule, PhD, MPH,<sup>£, ¥,§</sup>, Mohammad Daoud, BS<sup>ς</sup>,  
Rola Salman, BS<sup>‡,§</sup>, Rachel El-Hage, MS<sup>ς,§</sup>, Ola Ardati, BS<sup>ς</sup>, Malak El-  
Kaassamani, BS<sup>ς</sup>, Amira Yassine, BS<sup>ς</sup>, Nareg Karaoghlanian, BE<sup>‡,§</sup>, Soha Talih,  
PhD<sup>‡,§</sup>, Najat Aoun Saliba, PhD<sup>ς,§</sup>, Alan Shihadeh, ScD<sup>‡,§,\*</sup>*

<sup>†</sup> Division of Environmental Health Sciences, College of Public Health, The Ohio State University, Columbus, Ohio, USA

<sup>£</sup> Department of Health Education and Promotion, East Carolina University, Greenville, North Carolina, USA.

<sup>ς</sup> Department of Chemistry, Faculty of Arts and Sciences, American University of Beirut, Beirut, Lebanon

<sup>‡</sup> Department of Mechanical Engineering, Maroun Semaan Faculty of Engineering and Architecture, American University of Beirut, Beirut, Lebanon

¥ Center for the Assessment of Tobacco Regulations, University of Michigan and Georgetown University, Michigan & Washington DC, USA

§ Center for the Study of Tobacco Products, Virginia Commonwealth University, Richmond, Virginia, USA

¡ Center for Tobacco Research, The Ohio State University Comprehensive Cancer Center, Columbus, Ohio, USA.

\* Corresponding author: Alan Shihadeh, American University of Beirut, PO Box 11-0235

Riad El Solh, Beirut 1107 2020, Lebanon. Tel: +961 1 350000/4089. E-mail:

[as20@aub.edu.lb](mailto:as20@aub.edu.lb)

**Table S1.** Emissions from unflavored PG/G liquid, lab-prepared DIY liquids, and commercially available flavored e-cigarette liquids were reported as Average $\pm$ SD per session of 10 puffs.

| Flavor                          | ROS<br>(nmol<br>H <sub>2</sub> O <sub>2</sub> ) | FA ( $\mu$ g)                | AA ( $\mu$ g)                | Ac ( $\mu$ g)          | Acr ( $\mu$ g)         | PA ( $\mu$ g)          | CA ( $\mu$ g)         | MAcr<br>( $\mu$ g)    | GA ( $\mu$ g)          | MGA<br>( $\mu$ g)            | Phenol<br>( $\mu$ g) | Catechol<br>( $\mu$ g) |
|---------------------------------|-------------------------------------------------|------------------------------|------------------------------|------------------------|------------------------|------------------------|-----------------------|-----------------------|------------------------|------------------------------|----------------------|------------------------|
| PG/G                            | 12.90 $\pm$<br>1.32                             | 2.29 $\pm$<br>1.55           | 75.62 $\pm$<br>2.93          | 205.18 $\pm$<br>4.75   | 0.39 $\pm$<br>0.67     | 0.48 $\pm$<br>0.19     | 10.34 $\pm$<br>0.59   | 36.71 $\pm$<br>0.35   | 18.35 $\pm$<br>2.81    | 46.12 $\pm$<br>6.75          | 1.65 $\pm$<br>0.49   | 0.68 $\pm$<br>0.05     |
| 1% Sucralose                    | 13.40 $\pm$<br>2.81                             | 1.70 $\pm$<br>1.17           | 90.27 $\pm$<br>7.98          | 108.88 $\pm$<br>0.80   | 1.58 $\pm$<br>0.16     | 1.70 $\pm$<br>0.17     | 7.16 $\pm$<br>0.52    | 21.83 $\pm$<br>0.14   | 18.53 $\pm$<br>0.04    | 50.79 $\pm$<br>3.64          | 0.72 $\pm$<br>0.34   | ND                     |
| 1% Sucralose<br>(45 W)          | 30.81 $\pm$<br>17.65                            | 186.61 $\pm$<br>150.69       | 503.87 $\pm$<br>94.31        | 422.43 $\pm$<br>11.17  | 4.28 $\pm$<br>3.78     | 19.43 $\pm$<br>11.22   | 83.88 $\pm$<br>31.44  | 87.39 $\pm$<br>0.39   | 127.66 $\pm$<br>78.13  | 884.67 $\pm$<br>469.55       | 2.80 $\pm$<br>0.68   | ND                     |
| 3% Sucralose                    | 14.57 $\pm$<br>4.48                             | 2.74 $\pm$<br>2.37           | 94.71 $\pm$<br>17.40         | 201.94 $\pm$<br>3.21   | 0.95 $\pm$<br>0.83     | 0.80 $\pm$<br>0.61     | 10.96 $\pm$<br>1.33   | 36.27 $\pm$<br>0.36   | 20.42 $\pm$<br>0.08    | 81.10 $\pm$<br>29.48         | 1.65 $\pm$<br>0.14   | 0.66 $\pm$<br>0.02     |
| 3% Sucralose<br>(45 W)          | 43.76 $\pm$<br>9.35                             | 2255.14<br>$\pm$ 1790.0<br>6 | 2970.14<br>$\pm$ 2879.2<br>6 | 615.70 $\pm$<br>287.87 | 221.53 $\pm$<br>311.16 | 268.37 $\pm$<br>264.49 | 193.02 $\pm$<br>39.34 | 103.17 $\pm$<br>34.23 | 499.97 $\pm$<br>171.25 | 3400.96<br>$\pm$ 690.78      | 5.56 $\pm$<br>1.28   | 11.74 $\pm$<br>9.24    |
| 5% Sucralose                    | 12.80 $\pm$<br>1.05                             | 0.60 $\pm$<br>0.54           | 77.85 $\pm$<br>16.20         | 97.63 $\pm$<br>0.25    | 0.69 $\pm$<br>1.20     | 1.07 $\pm$<br>0.93     | 6.23 $\pm$<br>0.25    | 19.57 $\pm$<br>0.13   | 17.09 $\pm$<br>0.58    | 46.38 $\pm$<br>11.29         | 0.80 $\pm$<br>0.10   | ND                     |
| 5% Sucralose<br>(45 W)          | 10.07 $\pm$<br>2.08                             | 85.30 $\pm$<br>105.64        | 347.47 $\pm$<br>68.18        | 358.26 $\pm$<br>5.87   | 6.96 $\pm$<br>3.58     | 10.69 $\pm$<br>7.89    | 49.61 $\pm$<br>31.00  | 72.30 $\pm$<br>0.51   | 78.46 $\pm$<br>19.98   | 381.09 $\pm$<br>276.07       | 2.14 $\pm$<br>0.59   | ND                     |
| 3% CBD                          | 43.44 $\pm$<br>15.62                            | 733.11 $\pm$<br>1123.90      | 835.13 $\pm$<br>1192.76      | 207.61 $\pm$<br>140.17 | 110.81 $\pm$<br>187.85 | 105.75 $\pm$<br>165.55 | 31.60 $\pm$<br>18.33  | 45.64 $\pm$<br>35.92  | 108.48 $\pm$<br>147.81 | 1264.65<br>$\pm$ 1792.1<br>4 | 1.60 $\pm$<br>0.84   | 2.96 $\pm$<br>2.23     |
| 3% Essential Oil                | 16.04 $\pm$<br>3.47                             | 4.30 $\pm$<br>0.80           | 78.16 $\pm$<br>14.50         | 214.61 $\pm$<br>1.88   | 1.74 $\pm$<br>1.57     | 2.10 $\pm$<br>1.16     | 12.33 $\pm$<br>0.75   | 38.87 $\pm$<br>0.80   | 14.92 $\pm$<br>5.67    | 50.59 $\pm$<br>18.07         | 1.09 $\pm$<br>0.07   | 0.67 $\pm$<br>0.01     |
| 3% Ethyl maltol                 | 20.65 $\pm$<br>3.85                             | 2.44 $\pm$<br>0.99           | 82.71 $\pm$<br>2.95          | 109.00 $\pm$<br>0.71   | ND                     | 1.59 $\pm$<br>1.53     | 7.53 $\pm$<br>0.44    | 21.56 $\pm$<br>0.06   | 18.11 $\pm$<br>0.01    | 63.94 $\pm$<br>3.06          | 0.62 $\pm$<br>0.14   | ND                     |
| 3% Tobacco                      | 17.01 $\pm$<br>4.83                             | 2.82 $\pm$<br>0.26           | 124.48 $\pm$<br>23.83        | 120.72 $\pm$<br>1.54   | 2.45 $\pm$<br>0.51     | 2.72 $\pm$<br>0.24     | 7.68 $\pm$<br>0.11    | 24.19 $\pm$<br>0.34   | 15.11 $\pm$<br>1.30    | 34.13 $\pm$<br>6.00          | 0.59 $\pm$<br>0.24   | 0.64 $\pm$<br>0.01     |
| 3% Tobacco/<br>3% Sucralose     | 13.86 $\pm$<br>2.85                             | 1.48 $\pm$<br>0.27           | 99.02 $\pm$<br>24.13         | 186.76 $\pm$<br>5.28   | 1.06 $\pm$<br>1.01     | 1.32 $\pm$<br>0.17     | 10.16 $\pm$<br>0.35   | 35.42 $\pm$<br>0.41   | 18.59 $\pm$<br>2.85    | 60.53 $\pm$<br>16.11         | 1.44 $\pm$<br>0.20   | 0.66 $\pm$<br>0.01     |
| 3% Tobacco/<br>3% CBD           | 45.32 $\pm$<br>2.31                             | 17.85 $\pm$<br>3.36          | 163.12 $\pm$<br>41.05        | 121.31 $\pm$<br>2.22   | 2.74 $\pm$<br>0.52     | 5.51 $\pm$<br>0.32     | 10.18 $\pm$<br>0.37   | 24.59 $\pm$<br>0.23   | 16.52 $\pm$<br>1.27    | 71.71 $\pm$<br>9.49          | 1.57 $\pm$<br>0.87   | ND                     |
| 3% Tobacco/<br>3% Essential Oil | 16.71 $\pm$<br>1.12                             | 4.36 $\pm$<br>2.11           | 89.71 $\pm$<br>15.57         | 216.05 $\pm$<br>1.58   | 1.77 $\pm$<br>0.60     | 0.51 $\pm$<br>0.17     | 11.69 $\pm$<br>1.23   | 37.91 $\pm$<br>0.32   | 17.43 $\pm$<br>3.24    | 72.91 $\pm$<br>10.38         | 0.82 $\pm$<br>0.29   | 0.72 $\pm$<br>0.07     |
| 3% Menthol                      | 15.48 $\pm$<br>1.02                             | 2.08 $\pm$<br>0.20           | 148.50 $\pm$<br>17.68        | 120.07 $\pm$<br>0.38   | 2.15 $\pm$<br>0.03     | 2.55 $\pm$<br>0.10     | 7.53 $\pm$<br>0.16    | 24.28 $\pm$<br>0.10   | 14.61 $\pm$<br>0.73    | 29.51 $\pm$<br>5.80          | 1.03 $\pm$<br>0.43   | 0.65 $\pm$<br>0.01     |

|                                        |                 |                   |                   |                  |                   |                  |                 |                 |                   |                         |               |               |
|----------------------------------------|-----------------|-------------------|-------------------|------------------|-------------------|------------------|-----------------|-----------------|-------------------|-------------------------|---------------|---------------|
| 3% Menthol/<br>3% Sucralose            | 8.72±<br>1.47   | 1.09±<br>0.12     | 78.19±<br>1.02    | 194.64±<br>2.50  | ND                | 0.37±<br>0.36    | 10.28±<br>0.21  | 35.49±<br>0.17  | 20.28±<br>0.07    | 57.37±<br>20.97         | 1.39±<br>0.45 | 0.66±<br>0.01 |
| 3% Menthol/<br>3% CBD                  | 45.23±<br>12.30 | 622.44±<br>940.07 | 684.50±<br>935.76 | 179.61±<br>94.50 | 110.05±<br>185.79 | 79.48±<br>123.34 | 28.85±<br>14.63 | 38.30±<br>23.61 | 105.15±<br>140.25 | 1133.37<br>±1543.0<br>2 | 2.22±<br>0.99 | 1.88±<br>3.25 |
| 3% Menthol/<br>3% Essential Oil        | 18.66±<br>0.66  | 3.39±<br>0.52     | 85.27±<br>2.57    | 209.45±<br>1.97  | 1.53±<br>1.32     | 2.57±<br>0.13    | 12.71±<br>0.18  | 39.23±<br>0.02  | 11.08±<br>2.88    | 37.84±<br>0.48          | 0.74±<br>0.14 | 0.67±<br>0.03 |
| 3% Essential Oil/ 3%<br>CBD            | 16.55±<br>1.74  | 6.48±<br>2.41     | 134.72±<br>16.28  | 122.99±<br>1.33  | 2.43±<br>0.34     | 4.55±<br>0.85    | 8.36±<br>0.35   | 24.17±<br>0.28  | 15.69±<br>1.45    | 48.24±<br>9.87          | 1.33±<br>0.29 | ND            |
| 3% Sucralose/<br>3% CBD                | 12.78±<br>1.25  | 11.40±<br>12.26   | 115.97±<br>7.01   | 122.88±<br>1.37  | 1.49±<br>1.29     | 4.93±<br>1.48    | 12.70±<br>6.16  | 24.29±<br>0.17  | 16.70±<br>3.73    | 143.06±<br>103.35       | 2.05±<br>1.37 | ND            |
| 3% Sucralose/<br>3% Essential Oil      | 14.49±<br>2.26  | 2.03±<br>0.33     | 145.87±<br>15.12  | 115.64±<br>2.68  | 1.65±<br>1.48     | 5.15±<br>4.38    | 7.05±<br>0.46   | 24.10±<br>0.09  | 14.86±<br>1.14    | 42.47±<br>15.67         | 1.02±<br>0.19 | 0.65±<br>0.01 |
| 3% Free-base nicotine/<br>3% Sucralose | 15.94±<br>3.46  | 3.54±<br>0.86     | 122.12±<br>6.70   | 120.98±<br>0.09  | 1.46±<br>1.26     | 2.44±<br>0.30    | 8.16±<br>0.47   | 24.22±<br>0.23  | 14.78±<br>0.08    | 25.57±<br>1.12          | 1.68±<br>0.50 | ND            |
| 3% Nicotine salt/ 3%<br>Sucralose      | 8.55±<br>1.82   | 5.80±<br>4.45     | 142.35±<br>14.53  | 116.27±<br>1.58  | 2.30±<br>0.11     | 3.22±<br>0.39    | 11.15±<br>2.49  | 23.90±<br>0.12  | 15.53±<br>0.60    | 55.46±<br>29.86         | 0.98±<br>0.42 | ND            |
| DIY Concentrate 1                      | 35.74±<br>0.62  | 10.96±<br>7.75    | 123.93±<br>16.24  | 118.41±<br>2.82  | 1.68±<br>1.51     | 3.17±<br>0.35    | 9.62±<br>2.22   | 23.46±<br>0.41  | 17.02±<br>1.34    | 125.84±<br>57.67        | 0.72±<br>0.27 | 0.65±<br>0.01 |
| DIY Concentrate 2                      | 26.54±<br>1.78  | 23.05±<br>20.16   | 135.04±<br>25.81  | 123.05±<br>1.91  | 1.46±<br>1.27     | 8.97±<br>2.49    | 18.35±<br>4.02  | 23.80±<br>0.16  | 18.10±<br>1.68    | 316.32±<br>39.97        | 0.64±<br>0.00 | ND            |
| DIY Concentrate 3                      | 14.54±<br>1.29  | 31.83±<br>37.20   | 122.56±<br>29.50  | 119.24±<br>2.45  | 1.48±<br>1.29     | 4.82±<br>2.93    | 12.15±<br>5.29  | 23.74±<br>0.24  | 22.33±<br>12.01   | 177.70±<br>135.28       | 0.89±<br>0.24 | 0.72±<br>0.07 |
| DIY Concentrate 4                      | 9.10±<br>2.37   | 3.28±<br>0.66     | 102.49±<br>10.30  | 118.41±<br>0.27  | 1.05±<br>1.49     | 2.07±<br>0.22    | 7.13±<br>0.32   | 23.63±<br>0.07  | 14.04±<br>0.04    | 28.78±<br>3.37          | 0.65±<br>0.06 | ND            |
| DIY Concentrate 5                      | 22.96±<br>1.34  | 4.91±<br>1.35     | 125.22±<br>11.65  | 114.77±<br>2.15  | 1.46±<br>1.27     | 1.93±<br>1.67    | 8.16±<br>0.32   | 23.91±<br>0.37  | 14.51±<br>0.27    | 66.85±<br>4.97          | 0.92±<br>0.18 | 0.76±<br>0.12 |
| DIY Concentrate 6                      | 9.52±<br>0.83   | 6.98±<br>5.60     | 94.81±<br>1.71    | 119.75±<br>0.74  | 2.13±<br>0.01     | 2.80±<br>0.29    | 9.39±<br>1.63   | 23.67±<br>0.09  | 14.98±<br>0.79    | 43.63±<br>17.94         | 0.45±<br>0.11 | 0.71±<br>0.10 |
| DIY Concentrate 7                      | 9.19±<br>1.40   | 9.95±<br>7.55     | 113.90±<br>8.07   | 118.80±<br>0.30  | 1.70±<br>1.51     | 1.60±<br>1.39    | 9.68±<br>0.69   | 23.61±<br>0.21  | 15.78±<br>0.23    | 90.30±<br>53.54         | 0.38±<br>0.04 | 0.67±<br>0.01 |
| DIY Concentrate Mix                    | 45.03±<br>2.38  | 119.40±<br>204.12 | 278.48±<br>283.42 | 132.09±<br>25.36 | 33.99±<br>55.11   | 22.61±<br>34.28  | 18.72±<br>18.48 | 25.05±<br>2.53  | 73.88±<br>100.62  | 302.16±<br>345.06       | 0.64±<br>0.27 | 0.58±<br>0.51 |
| Virginia Tobacco                       | 4.41±<br>1.00   | 1.68±<br>0.71     | 115.33±<br>6.16   | 110.68±<br>0.55  | 3.01±<br>0.43     | 2.14±<br>0.41    | 6.99±<br>0.03   | 21.99±<br>0.07  | 19.52±<br>1.11    | 39.09±<br>1.60          | 0.96±<br>0.23 | 1.34±<br>0.05 |
| Unicorn Milk                           | 6.96±<br>3.53   | 6.64±<br>7.20     | 102.73±<br>13.88  | 108.05±<br>1.38  | 1.48±<br>1.44     | 2.12±<br>0.53    | 9.74±<br>4.09   | 22.14±<br>0.21  | 19.09±<br>1.50    | 40.89±<br>15.04         | 0.22±<br>0.02 | 0.84±<br>0.40 |
| Minty Menthol                          | 55.68±          | 299.90±           | 551.64±           | 141.87±          | 3.24±             | 76.50±           | 110.65±         | 22.29±          | 19.39±            | 156.39±                 | 1.65±         | 1.37±         |

|                     |                |                 |                  |                 |               |               |                |                 |                |                 |               |               |
|---------------------|----------------|-----------------|------------------|-----------------|---------------|---------------|----------------|-----------------|----------------|-----------------|---------------|---------------|
|                     | 4.66           | 363.10          | 578.53           | 50.65           | 2.28          | 100.36        | 132.28         | 1.35            | 0.41           | 155.41          | 0.75          | 1.23          |
| Strawberry Jam      | 25.94±<br>3.31 | 1.19±<br>0.29   | 117.78±<br>11.88 | 108.09±<br>0.86 | 1.81±<br>0.54 | 7.98±<br>0.53 | 6.94±<br>0.08  | 22.09±<br>0.21  | 18.42±<br>0.32 | 70.74±<br>4.42  | 0.26±<br>0.10 | 0.15±<br>0.25 |
| Blue Slushie        | 44.33±<br>4.52 | 15.14±<br>11.95 | 134.50±<br>13.18 | 105.69±<br>3.10 | 1.63±<br>0.06 | 3.21±<br>0.32 | 32.11±<br>2.89 | 110.86±<br>9.20 | 19.02±<br>0.67 | 43.15±<br>10.20 | 1.68±<br>0.22 | ND            |
| Pink Punch Lemonade | 18.30±<br>9.90 | 1.84±<br>0.94   | 129.47±<br>14.94 | 122.47±<br>6.27 | 1.86±<br>0.54 | 2.42±<br>0.46 | 9.03±<br>1.66  | 22.20±<br>0.16  | 18.35±<br>0.18 | 81.36±<br>60.95 | 0.48±<br>0.21 | ND            |
| Brain Freeze        | 22.39±<br>3.01 | 2.17±<br>0.88   | 159.32±<br>31.33 | 106.60±<br>2.05 | 2.07±<br>1.08 | 5.56±<br>0.26 | 7.14±<br>0.55  | 22.35±<br>0.19  | 23.27±<br>6.76 | 54.21±<br>17.85 | 0.85±<br>0.27 | ND            |

FA: formaldehyde, AA: acetaldehyde, Ac: acetone, Acr: acrolein, PA: propionaldehyde, CA: crotonaldehyde, MAcr: methacrolein, GA: glyoxal, MGA: methylglyoxal, ND: not detected.

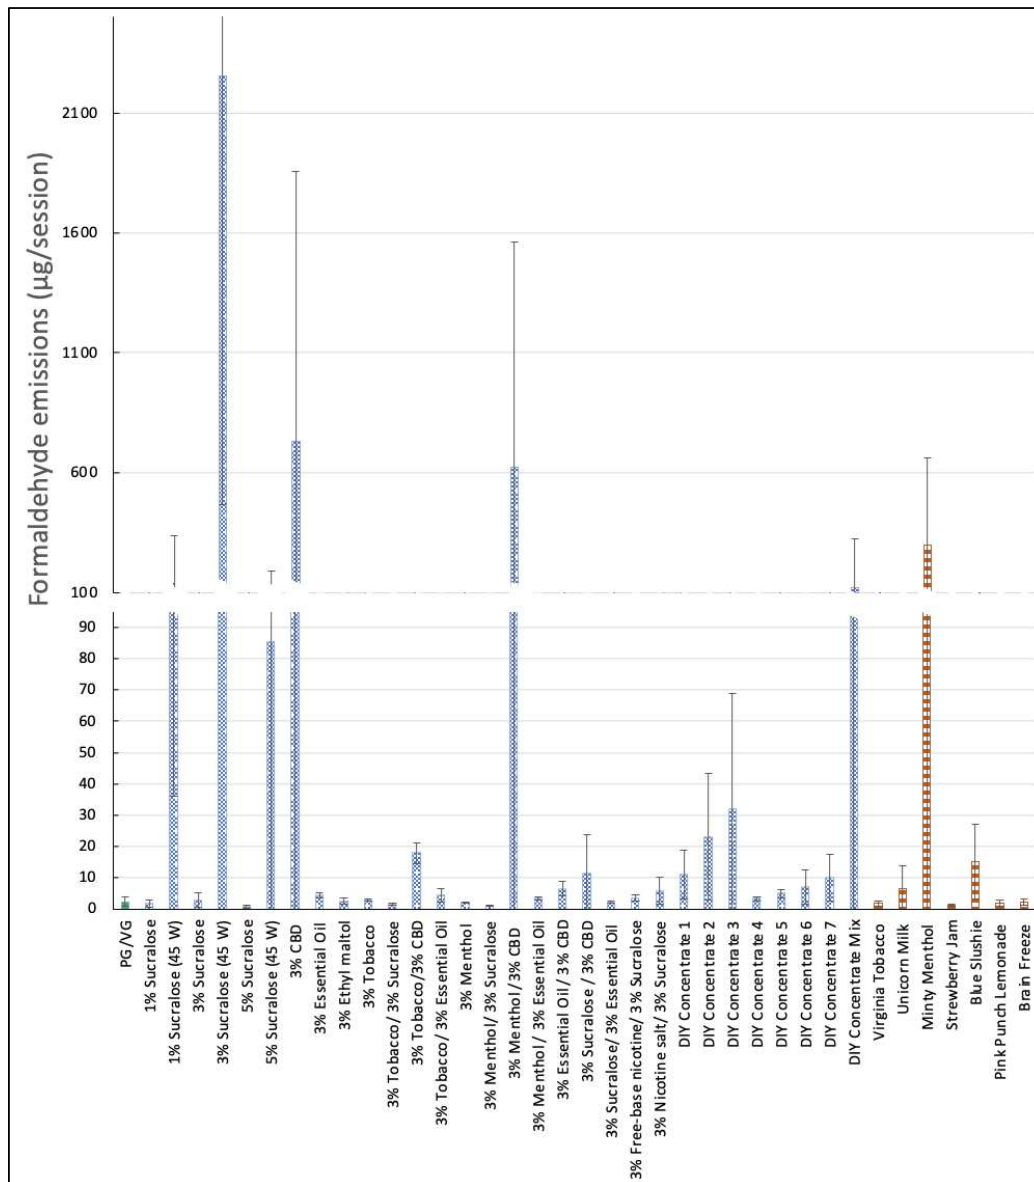

**Figure S1.** Formaldehyde emissions from 27 lab-prepared DIY e-cigarette liquids (dotted fill) in comparison to unflavored PG/VG liquid (solid fill) and 7 commercially available flavored e-liquids (horizontal stripes), all generated at 30W. Emissions from e-liquids with different levels of sucralose at 45W were added for comparison.

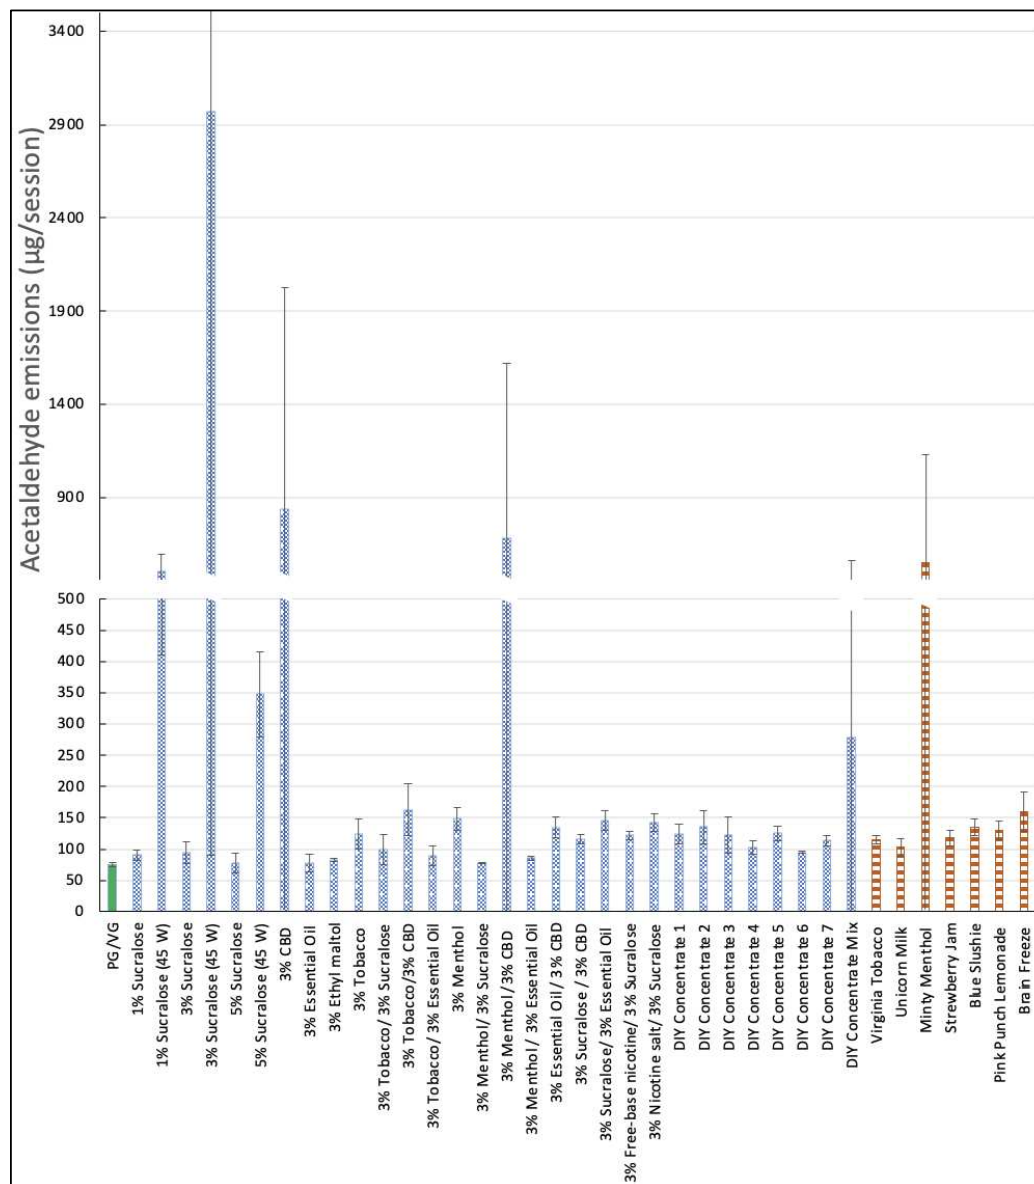

**Figure S2.** Acetaldehyde emissions from 27 lab-prepared DIY e-cigarette liquids (dotted fill) in comparison to unflavored PG/VG liquid (solid fill) and 7 commercially available flavored e-liquids (horizontal stripes), all generated at 30W. Emissions from e-liquids with different levels of sucralose at 45W were added for comparison.

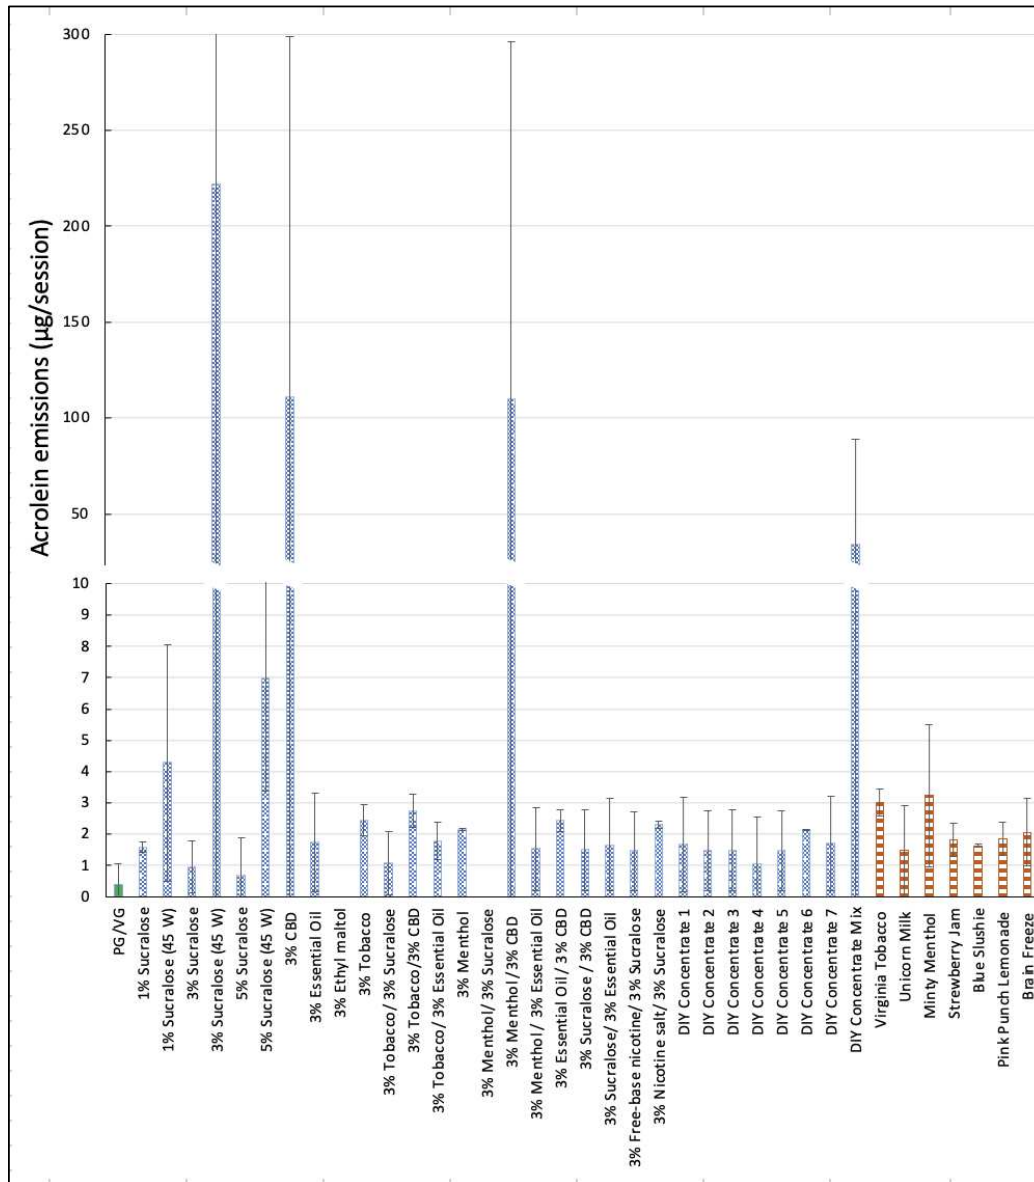

**Figure S3.** Acrolein emissions from 27 lab-prepared DIY e-cigarette liquids (dotted fill) in comparison to unflavored PG/VG liquid (solid fill) and 7 commercially available flavored e-liquids (horizontal stripes), all generated at 30W. Emissions from e-liquids with different levels of sucralose at 45W were added for comparison.



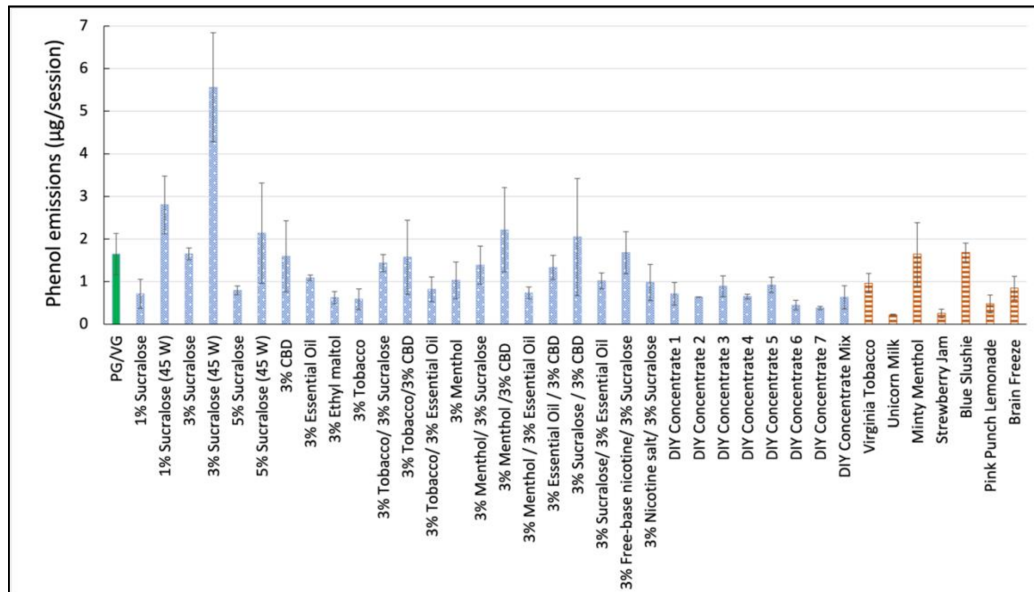

**Figure S4.** Phenol emissions from 27 lab-prepared DIY e-cigarette liquids (dotted fill) in comparison to unflavored PG/VG liquid (solid fill) and 7 commercially available flavored e-liquids (horizontal stripes), all generated at 30W. Emissions from e-liquids with different levels of sucralose at 45W were added for comparison.
